# Supplementary material
Source: HighWire-hosted journal article supplement (https://hw-f5-jim.highwire.org/content/jim-2021-002229)
Supplement: inline-supplementary-material-2 [file inline-supplementary-material-2.pdf]

**Supplemental Figure 2.** Distribution of the primary outcome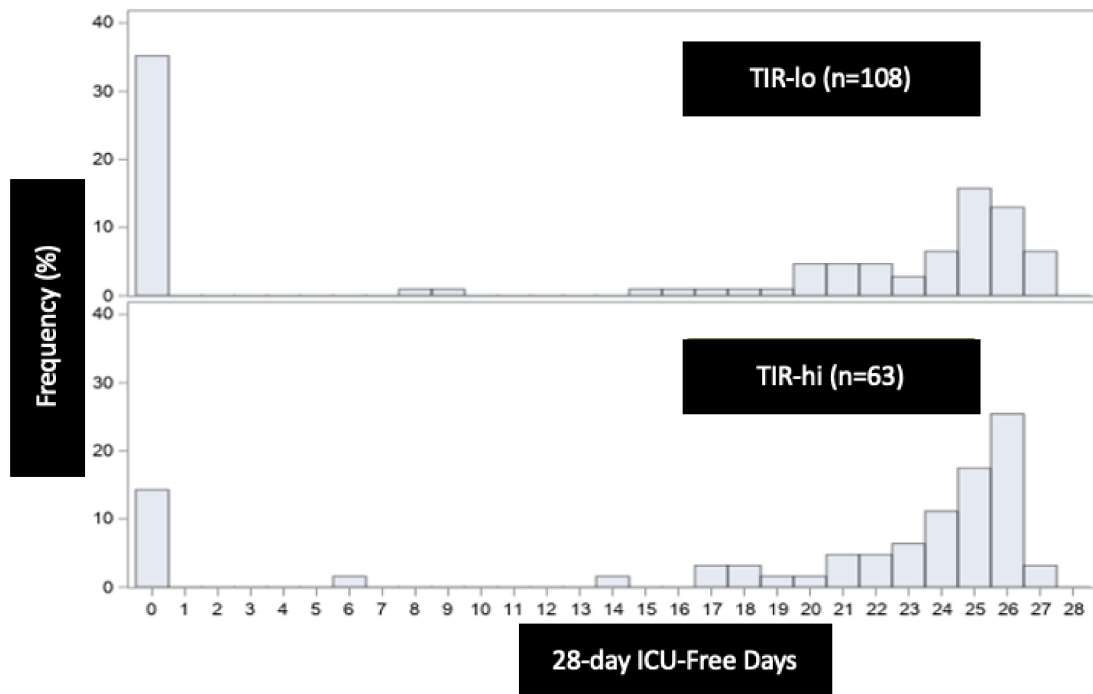

ICU = Intensive care unit, TIR = Time in targeted blood glucose range
