# Supplementary material
Source: HighWire-hosted journal article supplement (https://hw-f5-jim.highwire.org/content/jim-2021-002229)
Supplement: inline-supplementary-material-3 [file inline-supplementary-material-3.pdf]

**Supplemental Table 1.** Zero-inflated model

| <b>Analysis of Maximum Likelihood Zero Inflation Parameter Estimates</b> |           |                  |      |                      |
|--------------------------------------------------------------------------|-----------|------------------|------|----------------------|
| <b>Parameter</b>                                                         | <b>OR</b> | <b>OR 95% CI</b> |      | <b>Pr &gt; ChiSq</b> |
| Intercept                                                                | 0.10      | 0.04             | 0.29 | < 0.001              |
| TIR-lo                                                                   | 2.57      | 1.08             | 611  | 0.033                |
| TIR-hi                                                                   | Ref       |                  |      |                      |
| Pitt Bacteremia Score                                                    | 1.24      | 1.12             | 1.38 | < 0.001              |
| No corticosteroids                                                       | 0.47      | 0.22             | 0.99 | 0.048                |
| Received corticosteroids                                                 | 1         |                  |      |                      |

OR = Odds ratio, TIR = Time in targeted blood glucose range
