# Supplementary material
Source: HighWire-hosted journal article supplement (https://hw-f5-jim.highwire.org/content/jim-2021-002229)
Supplement: inline-supplementary-material-4 [file inline-supplementary-material-4.pdf]

**Supplemental Table 2.** Positive count model

| Analysis of Maximum Likelihood Zero Inflation Parameter Estimates |       |           |       |            |
|-------------------------------------------------------------------|-------|-----------|-------|------------|
| Parameter                                                         | OR    | OR 95% CI |       | Pr > ChiSq |
| Intercept                                                         | 23.50 | 21.41     | 25.80 | < 0.001    |
| TIR-lo                                                            | 1.01  | 0.94      | 1.09  | 0.780      |
| TIR-hi                                                            | 1     |           |       |            |
| Pitt Bacteremia Score                                             | 0.98  | 0.97      | 0.99  | 0.004      |
| No corticosteroids                                                | 1.08  | 1.00      | 1.17  | 0.065      |
| Received corticosteroids                                          | 1     |           |       |            |

OR = Odds ratio, TIR = Time in targeted blood glucose range
